# Supplementary material
Source: Springer Nature journal article supplement (https://www.springermedizin.de/resource/supplementary/12933_2009_201_MOESM3_ESM.pdf/9539820)

0.0 0.5 1.0 1.5 2.0 2.5

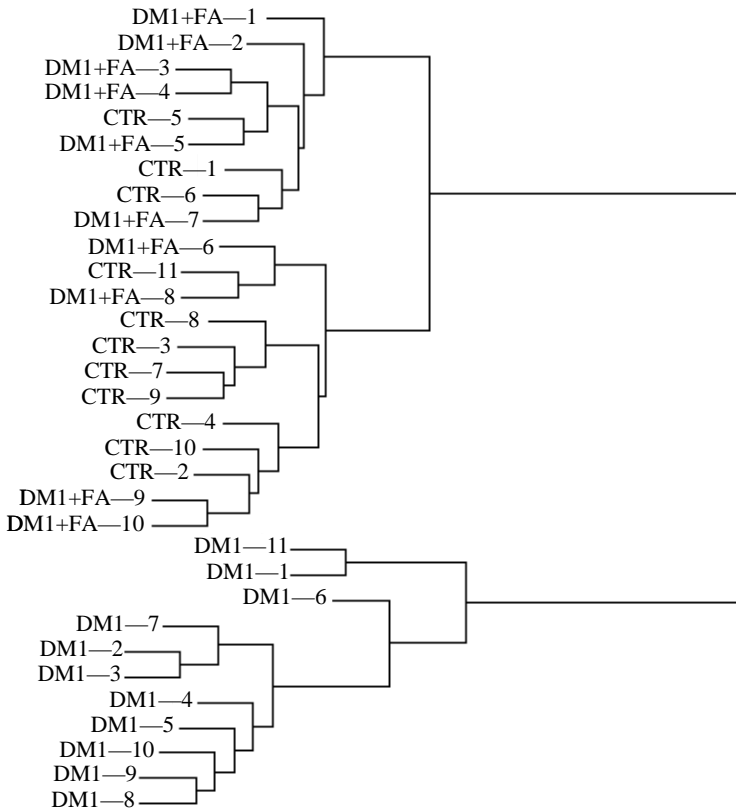

Supplement: MOESM3 [file 9539820]
